# Supplementary figures and images for: LUAD transcriptomic profile analysis ofd-limonene and potential lncRNA chemopreventive target
Source: Royal Society of Chemistry journal article supplement (doi:10.1039/d0fo00809e), 2020-01-01

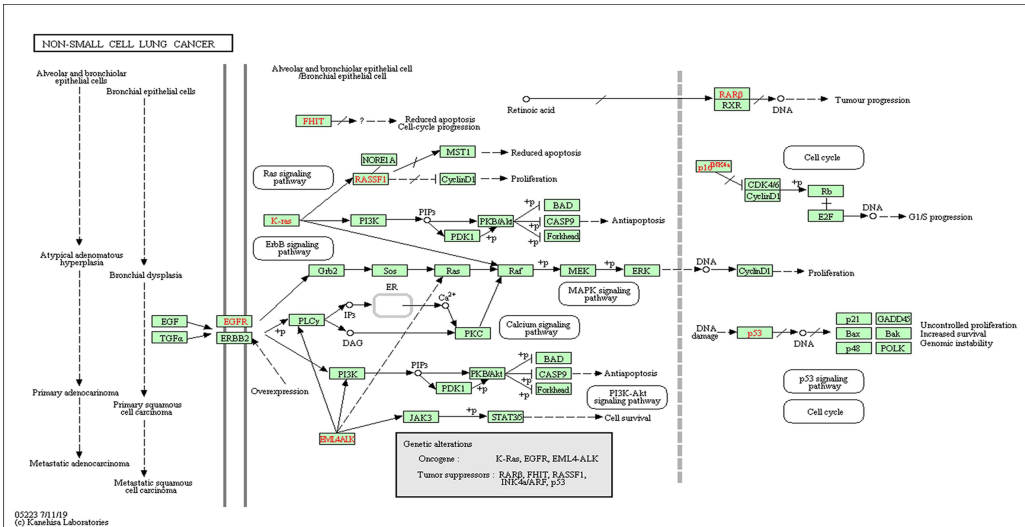

Supplement: d0fo00809e2.pdf [file d0fo00809e2.pdf]
